# Supplementary material for: Stereotactic and Robotic Minimally Invasive Thermal Ablation of Malignant Liver Tumours - A Systematic Review and Meta-Analysis
Source: Research Square preprint supplement (doi:10.21203/rs.3.rs-110302/v1), 2020-12-02
Supplement: Supplementary file 1 [file 045ef916213f320f2c9b08d7.xlsx]

## Sheet: Overall_Data
Accuracy	Efficency	Safety	Efficacy	Study No	Author	Year published	Years included	Lesion specification	Study design	Primary endpoint	Comparative study	Comparison group	Matching type	Tumor entity	Ablation technique	N patients	Age	N lesions	Lesion size [mm]	SD/range	Treatment access	Robotic guidance	Imaging technique	Tracking technology	Navigation device	Anesthesia, ventilation	Targeting accuracy Euclidean [mm]	Targeting accuracy lateral [mm]	Targeting accuracy angular [°]	Assessment of targeting accuracy	Analysis of factors associated with targeting accuracy	Statistically significant results	Type of analyses	Registration accuracy (FRE)	Targeting Length [mm]	Probe readjustment due to insufficient accuracy of ablation probe position	Exact definition	Technical/Targeting success	Definition targeting success	Probe repositioning due to insufficient tumor coverage after first ablation / N antenna insertions	Exact definition	Re-treatment after immediate scan	Overall procedure duration [min]	Exact definiton	Needle positioning time [min]	Exact definiton	Number of navigational CTs	Total DLP [mGy cm]	Complications overall
1	1	1	1	1	Tinguely_A	2020	15 to 17		R		0			HCC/metas	MWA	153		301	15	11 - 21	P	0	CT	Optical	CAS-ONE	General, Jet-Vent		3.5 ± 2.3 2.9 (0.2 - 14.1)	1.8 (1.1 – 2.7)	Targeting errors resulting after ablation probe positioning, defined as the deviance between the planned trajectory and the achieved ablation probe position, and was calculated as shown in Figure 2B	1	Cirrhosis Targeting trajectory length	Linear regression, GEE		111 (83 – 132)	4/301 lesions (1%)	Full retraction of ablation probe, repeat navigated alignment of aiming device and probe re-insertion	96% (290/301)	"Technical success": complete tumor coverage by the ablation zone as assessed on the final CT scan with intravenous contrast on the day of intervention, including immediate re-ablations (n = 48)	1 (77%) 2 19%) 3-5 (4%) 1.3 ± 0.6		48/301 lesions (16%)	70 ± 33 64 (46 - 82)	Time from first to last CT scan	8.7 ± 6 7 (4 - 13)	First switch to the navigation module until last screen shot taken of the positioned ablation probe		1912.8 ± 958.4 1732 (1202 - 2464)	10/191 (5%)
0	0	1	1	2	Schullian_A	2020	Jun 05 to Jun 18	CT-invisible lesions	R		1	SRFA without image fusion	Propensity score	HCC/metas	Unipolar RFA	60	HCC: 64.5 (45–77) Mets: 62.0 (7–78)	199	HCC: 29 Mets: 25	HCC: 5 - 110 Mets: 8 - 90	P	0	CT	Optical	Stealth Station Treon plus (Medtronic, USA)	General, tube disconnection												1	"Technical success": sufficiently accurate coaxial needle placement (deviation < 1 cm at all needle tips) according to predefined plans
0	1	1	1	3	Schaible	2020	Apr 14 to Nov 18		R	Primary efficacy	1	Manual guidance	None	HCC CCC Metas	MWA	Not reported		249	18.8	SD 10.8, 3 - 64	P	1	CT	Mechanical	MAXIO (Perfint Healthcare, India)	General, tube disconnection														92/249 lesions (37%)	"If there was suspicion of insufficient ablation margin repositioning was performed"								26/88 (29.6%)
0	0	1	1	4	Schullian_B	2020	Jan 06 to Jun 18	HCC with previous resection	R		0			HCC	Unipolar RFA	34	67.0 (31 - 81)	140	30	5 - 100	P	0	CT	Optical	Stealth Station Treon plus (Medtronic, USA)	General, tube disconnection												1	"Technical success": accurate electrode placement according to protocol with immediate, complete coverage by the ablation zone
0	0	1	1	5	Schullian_C	2020	Jan 05 to Jun 18	Very large > 8 cm tumors	R		0			HCC CCC Metas	Unipolar RFA	34	66 (27–81)	41	90	80 - 180	P	0	CT	Optical	Stealth Station Treon plus (Medtronic, USA)	General, tube disconnection												1	"Technical success": accurate electrode placement, with a deviation <1 cm at the needle tip, according to predefined plan
0	1	1	1	6	Schullian_D	2020	05 to 18	Multiple ≥ 4 tumors	R		0			HCC Metas	Unipolar RFA	92	61 (25–81)	549	2.7	0.5 - 13	P	0	CT	Optical	Stealth Station Treon plus (Medtronic, USA)	General, tube disconnection												1	"Technical success": deviation < 1 cm at the needle tip (according to predefined plans)				254.5 ± 112 (calculated) 240 (75 - 463)	Interval between planning CT and final control CT
1	1	1	1	7	Volpi	2019	Jun 17 to Jan 18	US-undetectable / difficult-to-access	R		0			HCC Metas	RFA/MWA	21	67 (47-84)	27	12	SD 5.7	P	0	CT	EM	IMACTIS (Imactis, France)	General, Jet-Vent	22 ± 19			"first-pass control = aiming at approx. 1 cm from the tumor" -> not used for final ablation!					111 ± 31	1/21 patients (4.8%)	withdrawing the probe for repositioning	0.96	"Approx. 1 cm from the tumor", first-pass control	4 pat (15%) 1.14 ± 0.35	Re-adjustments for second overlapping ablation Mean number of applications per lesion	4 lesions (15%)	58.3 ± 24.5 (calculated) 51 (23 - 108)	Not further defined	23 ± 12	From planning to the last pre-ablation CT acquisition	3.2 ± 1.3	2180 ± 1054	2/27 (7%)
0	0	1	1	8	Schullian_E	2019	06 to 18	Octogenarians	R		1	< 80 years old	Propensity score	HCC CCC Metas	Unipolar RFA	36	81.5 (80 - 88) (deliberate)	70	27	15 - 90	P	0	CT	Optical	Stealth Station Treon plus (Medtronic, USA)	General, tube disconnection												1	Sufficient targeting accuracy, "according to predifined plan"
0	0	1	1	9	Schullian_F	2019	05 to 17	Caudate HCC	R		0			HCC	Unipolar RFA	20	58 (31 - 79)	24	15	10 - 80	P	0	CT	Optical	Stealth Station Treon plus (Medtronic, USA)	General, tube disconnection												1	Not defined
0	0	1	1	10	Perrodin	2019	15 to 17		R		0			Non-CRLM metas	MWA	23	58.4 (7 - 79)	40	13.5	6 - 39	P	0	CT	Optical	CAS-ONE (CAScination AG, Switzerland)	General, Jet-Vent												97.5%	Incomplete ablation immediate CT scan										3/25 (12%)
0	0	1	1	11	Schullian_G	2019	06 to 18	Hepatic dome tumors	R		1	Non-dome lesions	Propensity score	HCC CCC Metas	Unipolar RFA	177	65 (7 - 87)	238	22	5 - 100	P	0	CT	Optical	Stealth Station Treon plus (Medtronic, USA)	General, tube discon												1	Sufficient targeting accuracy (deviation < 1 cm at the needle tip), "according to predifined plan"
0	0	1	1	12	Schullian_H	2019	03 to 18	Subcardiac HCC	R		1	Non- subcardiac lesions	Propensity score	HCC	MWA	79	65.5 (45 - 85)	114	25	5 - 95	P	0	CT	Optical	Stealth Station Treon plus (Medtronic, USA)	General, tube discon												1	Accurate electrode placement according to protocol with immediate, complete coverage by the ablation zone
0	1	1	1	13	Zhang_A	2019	Aug 16 to Jan 18	Solitary nodule <5cm	RCT	Not defined	1	Conventional CT guidance		HCC CRLM	RFA/MWA	20	52.5 (45-71)	20	24	SD 11, 7 - 46	P	0	CT	EM	IG4 (Veran Medical Technologies Inc, USA)	Local, sedation										2.4 +/- 1.2	Withdrawal of the electrode, position correction and new puncture	1	Treatment according to the protocol and complete coverage by the ablation zone	1.2 ± 0.4	Not defined				16.5 ± 10.6	From the first CT scan of the patient until the ablation electrode reached the target tumor	7.1 ± 1.7	807 ± 285
1	1	1	1	14	Lachenmayer	2019	15 to 17		R		0			HCC	MWA	88	66 (46 - 84)	174	16	4 - 45	P	0	CT	Optical	CAS-ONE (CAScination AG, Switzerland)	General, Jet-Vent		3.8 ± 2.4 3.2 (0.2 - 14.1)										0.96	The control of the ablation zone revealed an insufficient margin for 26 lesions immediately post-ablation, 19 of which could be immediately re-ablated			19 lesions (11%)	36.3 ± 18.9 36 (3.6 - 88)	Not further defined	9 ± 6.4 7.1 (0.6 - 25.2)	First switch to the navigation module until last screen shot taken of the positioned ablation probe		2023,3 ± 912,0 1896 (571 - 4748)	7/119 (5.9%)
1	1	1	1	15	Heerink	2019	Feb 17 to Nov 17	Tumor size < 5, number < 3	RCT	N antenna repositionings	1	Freehand antenna placement		CRLM HCC Benign	MWA	18	60.1 ± 15.2	21	21.2	SD 10.2	P	1	CT	Mechanical	Needle Positioning System (DEMCON Advanced Mechatronics, Netherlands)	General, tube discon	10.2 ± 5.2	6.4 ± 4.2	4.5 ± 3.2	"Adequate" placement: position within the tumor (except if close to liver capsule). CAVE: not clear how many in stereotactic group were manually repositioned -> not used for final ablation					92.9 ± 31.8	0/21 lesions (4.8%)	N antenna repositionings to reach a position inside the tumor						160 ± 26	Time from the patient’s arrival in the CT room to the time of the patient’s departure	36.3 ± 19.3 (calculated) 36 (3 - 70)	Time from target selection until adequate antenna position	5	876 (242 - 3539)	1/18 (5.6%)
1	1	1	1	16	Beyer_A	2018	Apr 16 to Apr 18		P cohort study	Procedure time, targeting accuracy, radiation doses	1	Conventional MWA	Matched pairs (tumor size, segment, entity)	HCC CRLM	MWA	18	63.7 ± 11.6	18	20.6	SD 9.0	P	0	CT	Optical	CAS-ONE (CAScination AG, Switzerland)	General, tube discon	3.7 ± 1.2	2.8 ± 1.3	2.7 ± 1.5	Euclidean distance between the planned trajectory and actual antenna position						1/18 patients (5.6%)	Antenna repositioned until active feed point of MWA antenna determined to be in the tumor center						21.8 ± 6.3	Time from the first CT scan to the verification scan with the final antenna position	3.7 ± 2.5	Not further defined		2115 ± 276	0/18
0	1	1	1	17	Zhang_B	2018	Apr 13 to Oct 15	Single nodule, 3-8cm	R	Safety, efficiency of multiple antenna placements for large HCC	1	Manual guidance (US)	None	HCC	MWA	19	61.3 ± 9.9	19	41.4	SD 9.5	P	0	CT/US	EM	Fusion image navigation system (FINS) (self developed)	General								When Root Mean Square (RMS) smaller than 10, image registration considered to be complete				94.7%	Complete ablation of macroscopic tumor proved by CEUS within 3 days	3.7 ± 1.6	"Sum of the number of each antenna insertion at the end of the session"				5.1 ± 0.8	Total time needed for the operation minus the time of ablation, divided by the number of antenna insertions			Text: 57.9% Table 3: 14/19 (73.9%)
0	0	1	1	18	Bale_A	2017	Dez 05 to Jul 16		R		0			BeastCa Metas	Unipolar RFA	26	54.4 ± 12.8	64	2.8	SD 2.1	P	0	CT	Optical	Stealth Station Treon plus (Medtronic, USA)	General, tube discon
0	1	1	1	19	Tinguely_B	2017	Jan 13 to Oct 15		R		0			HCC Metas	MWA	51	63.3 ± 9.3	346	16.7	SD 9.8 4.9 - 56.5	L	0	Preoperative CT	Optical	CAS-ONE (CAScination AG, Switzerland)	General, tube discon								8.1 +/- 2.8				1	Ablation during surgery				102 ± 64	Not further defined (surgery time included)					15/54 (28%)
0	0	1	1	20	Hirooka	2017	May 14 to Oct 14	Solitary HCC, <5 cm in diameter	P cohort study	Relapse-free survival, deformity of ablation volume	1	Free-hand ablation	None	HCC	Bipolar RFA	27	71.6 ± 9.1	27	23.9	SD 9.1 6 - 40	P	0	CT/US	EM	3D sim-Navigator (Hitachi Healthcare, Japan)	General												Not reported	Necrotic area of the target nodule and surrounding liver parenchyma was depicted as an area of hypoattenuation CT after 2-3 days	1 (3.7%)	If width of ablation area not satisfactory, applicator repositioned in another position, again outside the tumor. After re-insertion, additional ablation performed	1 (3.7%)
1	1	1	0	21	Engstrand	2016	Mar 13 to Jan 14	Not visible on US, max 2 lesions, <30mm	R		0			HCC Metas	MWA	17	69.6 ± 9.2	25	14.9	SD 5.9	P	0	CT	Optical	CAS-ONE (CAScination AG, Switzerland)	General, Jet-Vent	5.8 ± 3.2	4.0 ± 2.5	2.7 ± 2.9						87.5 ± 27.3	1/25 lesions (4%)	Number of needle readjustments						57.9 ± 25.2 59 (26 - 126)	Time from acquisition of the first planning scan to withdrawal of the antenna				958 ± 557	2/25 (8%)
0	0	1	1	22	Bale_B	2016	Jan 05 to Dec 13	< 5cm	R		0			Melanoma Metas	Unipolar RFA	20	60 (42 - 76)	75	17	5 - 145	P	0	CT	Optical	Stealth Station Treon plus (Medtronic, USA)
1	1	1	1	23	Beyer_B	2015	Jun 14 to Feb 15		R		1	Manual guidance	None	HCC Metas	MWA	Not reported		34	19.1	SD 9.0	P	1	CT	Mechanical	MAXIO (Perfint Healthcare, India)	General, apnea (?)	3.1 ± 2.5 (after manual adaption: 1.6 ± 1.3)			Cartesian (=Euclidean) distance (active center to tumor center)						14/34 lesions (41.2%)	Manual position correction after robotic needle placement						18.3 ± 2.0	From the preinterventional planning multi-slice CT to the beginning of the ablation				2216 ± 1057	0/34
0	1	1	1	24	Abdullah_A	2015	Aug 13 to Feb 14		R		1	For radiation doses: cohort of pat targeted free-hand	None	HCC Metas	RFA/MWA	20	59	40	23	6 - 49	P	1	CT	Mechanical	MAXIO (Perfint Healthcare, India)	General, tube discon										12/20 patients (60%) Mean n: 0.8 ± 0.8 (0 - 3)	Not defined	1	"Successfully completed": not defined	2.0 ± 1.3 (1-5)	Not defined							1382 ± 536	0/20
1	1	1	0	25	Mbaliske	2014	Jun 13 to Dec 13	Single nodule, TACE within 3 month prior to ablation	P cohort study	Not defined	1	Manual guidance	None	HCC CCC Metas	MWA	30	57.7 ± 15 (33 – 83)	30	23.2	SD 8.4, 11 – 46	P	1	CT	Mechanical	MAXIO (Perfint Healthcare, India)	Local, sedation	Initial attempt: 5.3 ± 1.8, After re-adjustment: 1.9 ± 1.7								115 ± 33.7 (80 - 135)	1.13 ± 0.7 (0 - 3)	Not defined			2.1 ± 0.73 (1–3)	N of insertions (NOI) performed with the applicator after each thermoablation procedure		25.2 ± 2.8	Including planning time, preparation time (insertion time and ablation time)	1.5 ± 0.57	Time duration for an accurate insertion of the applicator into the target tumour		193.8 ± 93 (148 - 251)	0/30
0	1	1	1	26	Sindram	2014			P case series		0			HCC Metas	MWA	13	59.4 ± 11.1	34	18.0	SD 9.2 5 - 40	L	0	US	EM	AIM Guidance System (InnerOptic Technology Inc., USA)	General										3/34 lesions (8.8%)	93% first-attempt passes = hit the target						91.9 ± 37.4 (46 - 177)	Not further defined (surgery time presumably included)					3/13 (23%)
0	1	1	1	27	Schullian_I	2014	Jan 05 to Mar 10	Prior laparoscopic liver packing	R		0			HCC CCC Metas	Unipolar RFA	47	64, 34 – 83	120	24	1 - 150	P	0	CT	Optical	Stealth Station Treon plus (Medtronic, USA)	General, tube discon																	129 ± 87.8 (calculated) 90 (16 - 320)	Median ablation time (without laparoscopic packing)
1	0	1	1	28	Mauri	2014	Dec 02 - Dec 12	Undetectable with unenhanced US and either totally or incompletely conspicuous on CEUS	R		0			HCC Metas	RFA/MWA	175	66 ± 12.3	295	13	SD 6 5 - 25	P	0	US-CT US-MRI	EM	VirtuTrax (CIVCO Medical Solutions, USA)	General, tube discon/end-exp	95.6%			"Correct targeting" as assessed on 24h CT/MRI: "Center of the ablated zone located within 5-mm range from the ideal target point preoperatively established"	1	None	Univariate between-group analyses					90.2%	At 24h CT/MRI: Nonenhancing necrotic volume covered the whole tumor and a margin of at least 5 mm										11/215 (5.1%)
0	1	1	1	29	Abdullah_B	2013			R		0			HCC CRLM	RFA	11	63.2	17	21.8	SD 5.4 11 - 30	P	1	CT	Mechanical	ROBIO EX (Perfint Healthcare, India)	General, tube discon										6/17 patients (35%) Mean 0.67 (0 - 2)	Not defined	1	Complete ablatio on multiphasic CE-CT immediately after ablation	Mean 1.5 (1 - 4)	Not defined							956.09 ± 400.33	0/11
0	0	1	1	30	Bale_C	2011	05 to 11		R		0			CRLM	Unipolar RFA	63	66 (33 - 85)	189	20	5 - 130	P	0	CT	Optical	Stealth Station Treon plus (Medtronic, USA)	General, tube disconnection
0	0	1	1	31	Haidu	2011	Dec 04 to Jun 10	Inoperable ICC	R		0			ICC	Unipolar or multipolar RFA	11	61 ( 39–80)	36	3	5 - 100	P	0	CT	Optical	Stealth Station Treon plus (Medtronic, USA)	General, tube disconnection
0	0	1	1	32	Widmann_A	2011	Jan 08 to Jan 10	Lesions close to hollow viscera: prior laparoscopic packing	R		0			HCC CCC Metas	Unipolar RFA	90	61.1, 22–85	177	29	5 - 110	P	0	CT	Optical	Stealth Station Treon plus (Medtronic, USA)	General, tube disconnection																							31/106 (29.3%)
1	0	1	0	33	Widmann_B	2011	Jul 08 to Apr 09		P case series		0			Not specified	RFA	20		35	31	10 - 80	P	0	CT	Optical	Stealth Station Treon plus (Medtronic, USA)	General, tube disconnection		3.6 ± 2.5 (0.0 – 14 mm)	1.3 ± 1.2 (0.0 – 7.9)	Distance between the tip of the plan to the tip of the coaxial needle	1	Lateral error at needle tip: Seg II vs Seg Ivb location "Clear parenchymal " vs "subphrenic plus fat"	Univariate between-group analyses	Root Mean Square (RMS) < 1mm -> onlr then accepted															0/20
0	1	1	1	34	Liu	2011	Oct 09 to Sept 10	Undetectable on US but detectable by iv contrast CT or MRI, ≤ 3 nodules	P case series		0			HCC	MWA	18	59.3 ± 9.9 (42 - 75)	18	18.5	SD 7.7 9 - 38	P	0	US-CT US-MRI	EM	MyLab90 System equipped with Virtual Navigator, (Esaote SpA, Italy)	Local, sedation								Less than 5 mm, the fusion image was considered successful						1.28 ± 0.46	Antenna placements for each tumor until this tumor was ablated completely
[truncated: 42 more columns]
